# Supplementary material for: Yttrium hydroxide fluoride based monodisperse mesocrystals: additive-free synthesis, enhanced fluorescence properties, and potential applications in temperature sensing
Source: Royal Society of Chemistry journal article supplement (doi:10.1039/c4ce01823k), 2014-11-04
Supplement: c4ce01823k1.pdf [file c4ce01823k1.pdf]

## Electronic Supporting Information

### **Yttrium hydroxide fluoride based monodisperse mesocrystals: additive-free synthesis, enhanced fluorescent properties, and potential application in temperature sensing**

Xianghong He,<sup>†,‡</sup> Bing Yan<sup>†,\*</sup>

<sup>†</sup>Department of Chemistry, Tongji University, Shanghai, 200092, China

<sup>‡</sup>School of Chemistry and Environmental Engineering, Jiangsu University of Technology,  
Changzhou, Jiangsu 213001, China

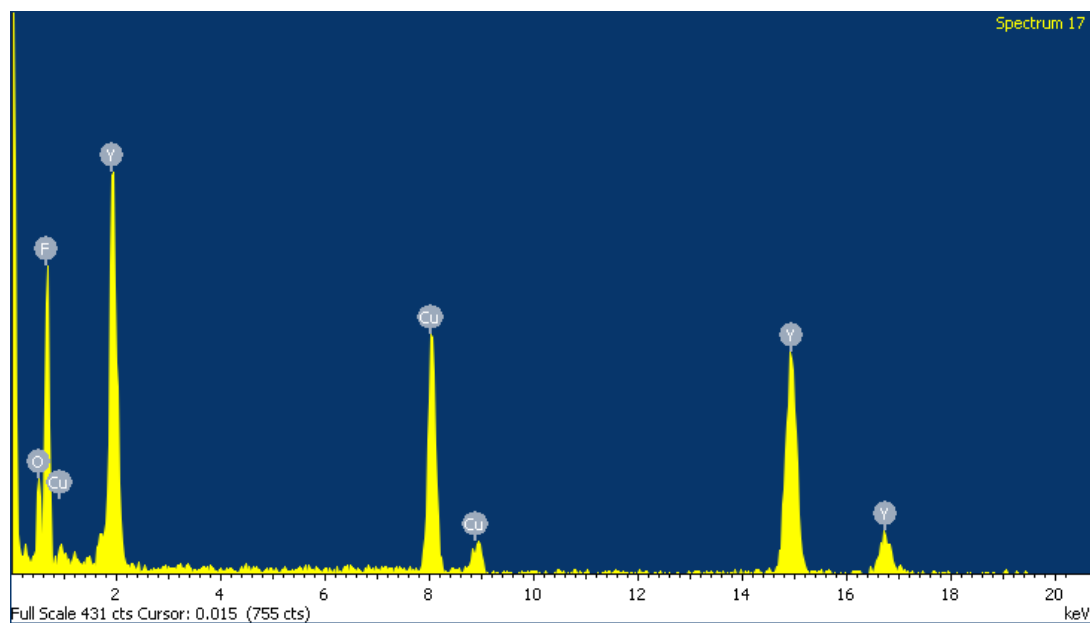

**Figure S1** EDS spectrum of as-obtained YHF mesocrystal

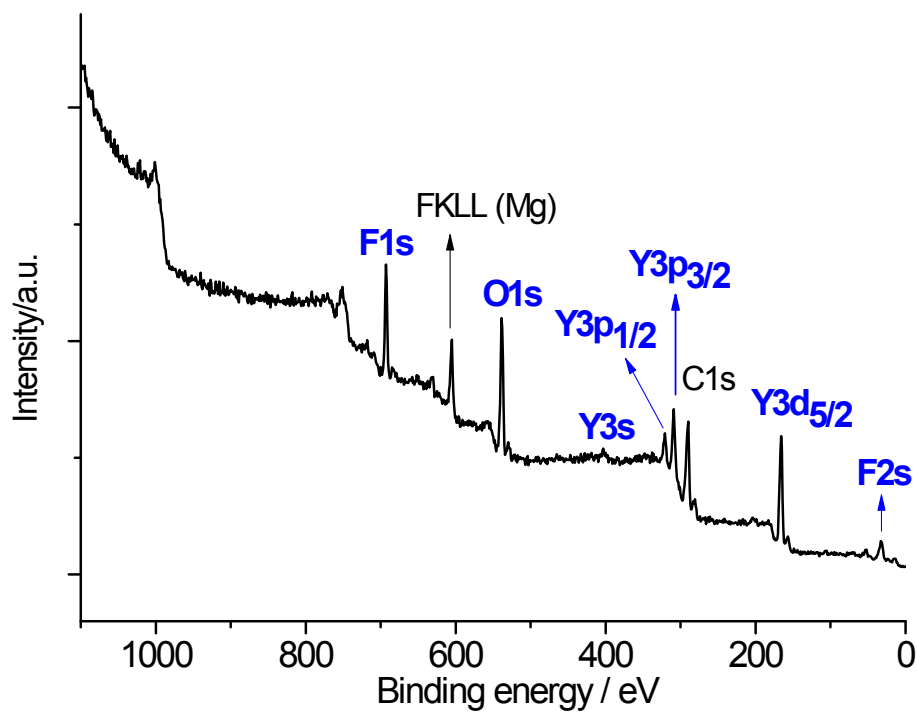

**Figure S2** X-ray photoelectron survey spectrum of as-obtained YHF mesocrystal  
(The peak at 284.6 eV is due to C1s, which was used to calibrate the binding energy).

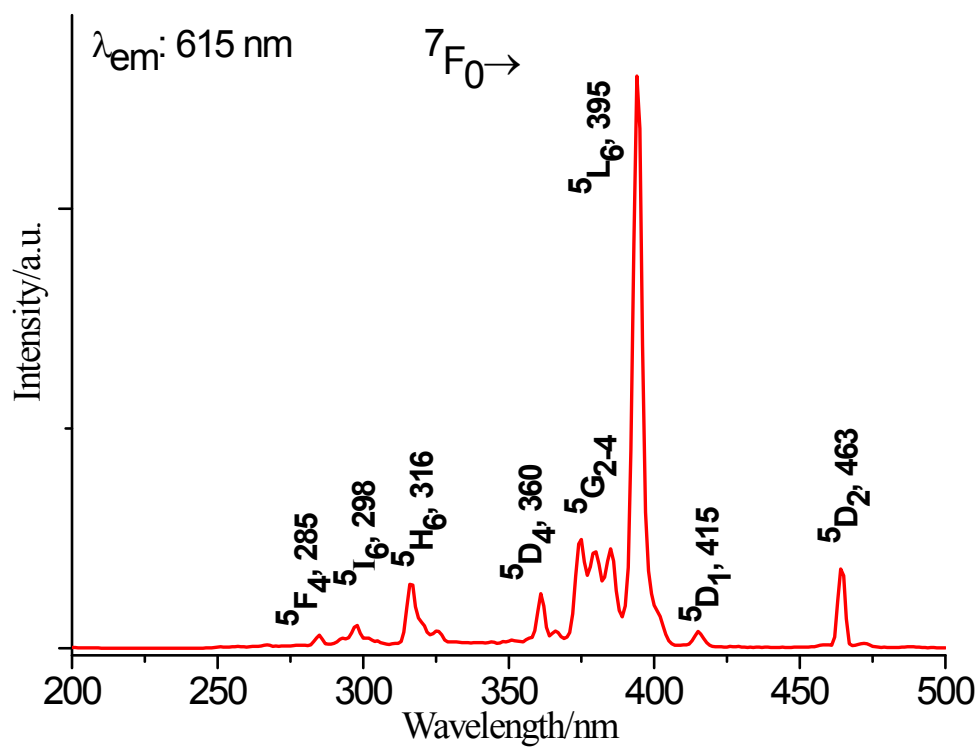

**Figure S3** Room temperature excitation spectrum of YHF:Eu<sup>3+</sup> mesocrystalline phosphor (The detailed assignments of every peak are labeled).

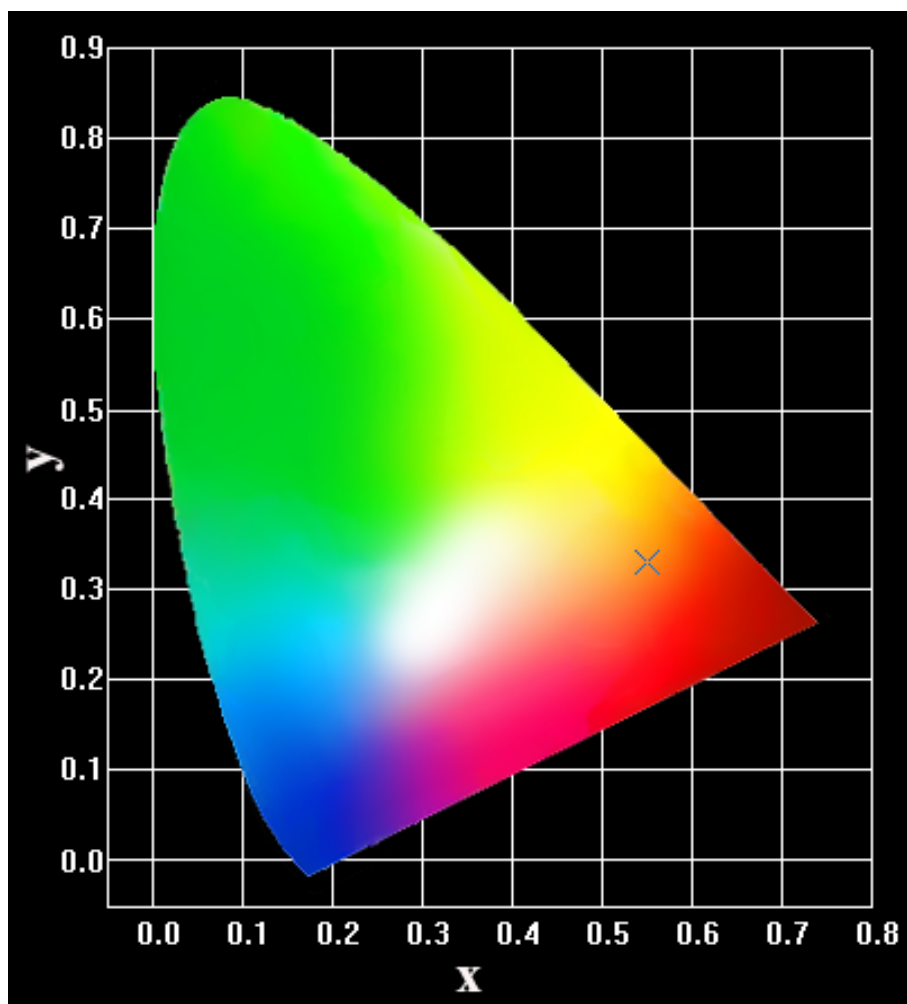

**Figure S4** CIE chromaticity diagram for YHF:Eu<sup>3+</sup> mesocrystalline phosphor.

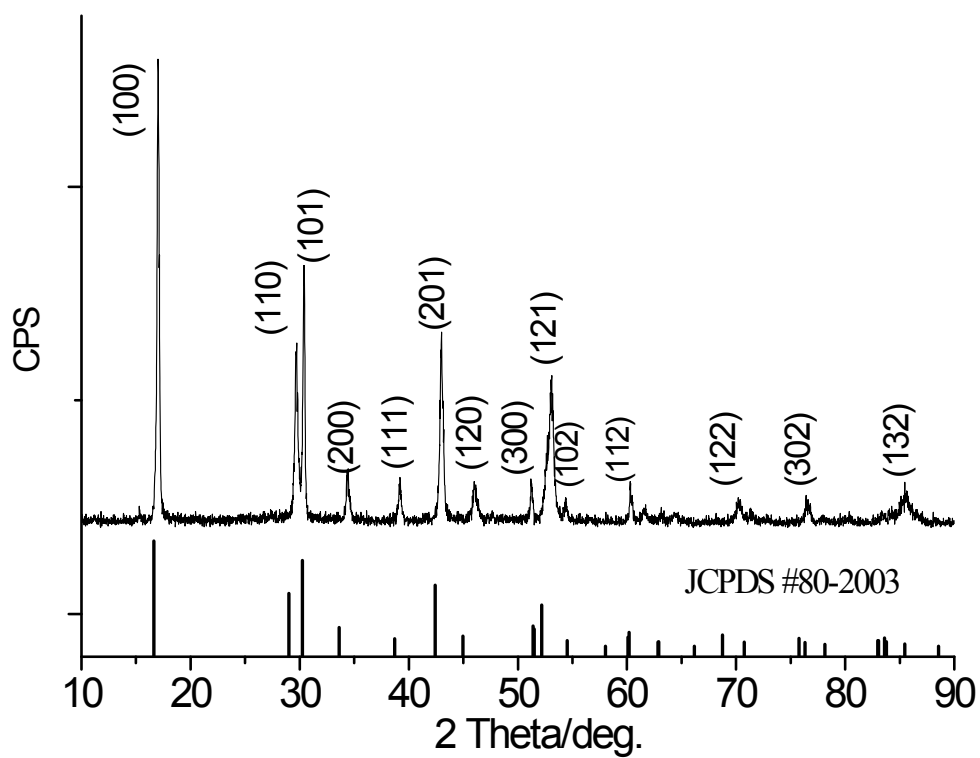

**Figure S5** XRD pattern of as-synthesized YHF:Eu<sup>3+</sup>(5 mol%) microcrystal phosphor. XRD pattern of YHF:Eu<sup>3+</sup>(5 mol%) microcrystal phosphor can be identified as Y(OH)<sub>3-x</sub>F<sub>x</sub> phase with hexagonal structure.

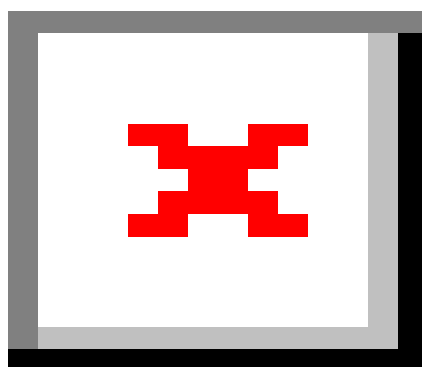

**Figure S6** SEM image of YHF:Eu<sup>3+</sup>(5 mol%) microcrystal phosphor. This microcrystal phosphor shows rod-like morphology and displays a relatively uniform size with several micrometers in length and 160–250 nm in diameter. In addition, some nanoparticles are attached on the surfaces of rod-like microcrystals. The morphology is similar to those reported previously for YHF obtained through hydrothermal reaction at 450 °C. [See B. Q. Liu, K. Guo, J. Wang, Z. J. Zhang, Y. Tao, Y. Huang and J. T. Zhao, *Mater. Lett.*, 2013, **100**, 245.]

**Table S1** Summary of the Asymmetry Ratio, Lifetime, and Quantum Yield of YHF:Eu<sup>3+</sup>(5 mol%) mesocrystalline and microcrystal phosphors

| Sample                               | Asymmetric Ratio | Lifetime (ms) | Quantum Yield (%) |
|--------------------------------------|------------------|---------------|-------------------|
| YHF:Eu <sup>3+</sup> mesocrystalline | 2.52             | 1.28          | 41.5              |
| YHF:Eu <sup>3+</sup> microcrystal    | 1.87             | 0.87          | 20.9              |
